# Supplementary material for: Adhesion GPCR Gpr126 (Adgrg6) Expression Profiling in Zebrafish, Mouse, and Human Kidney
Source: MDPI journal article supplement (doi:10.3390/cells12151988), 2023-08-02
Supplement: s1 [file s1]

Supplementary information

# Adhesion GPCR Gpr126 (Adgrg6) Expression Profiling in Zebrafish, Mouse, and Human Kidney

Salvador Cazorla-Vázquez <sup>1</sup>, Peter Kösters <sup>1</sup>, Simone Bertz <sup>2</sup>, Frederick Pfister <sup>3</sup>, Christoph Daniel <sup>3</sup>, Mark Dedden <sup>4</sup>, Sebastian Zundler <sup>4</sup>, Tilman Jobst-Schwan <sup>5,6</sup>, Kerstin Amann <sup>3</sup>, and Felix B. Engel <sup>1,\*</sup>

<sup>1</sup> Experimental Renal and Cardiovascular Research, Department of Nephropathology, Institute of Pathology, Friedrich-Alexander-Universität Erlangen-Nürnberg (FAU), 91054 Erlangen, Germany.

<sup>2</sup> Institute of Pathology, University Hospital Erlangen, Friedrich-Alexander-Universität Erlangen-Nürnberg (FAU), 91054 Erlangen, Germany.

<sup>3</sup> Department of Nephropathology, Institute of Pathology, University Hospital Erlangen, Friedrich-Alexander-Universität Erlangen-Nürnberg (FAU), 91054 Erlangen, Germany.

<sup>4</sup> Department of Medicine 1, University Hospital Erlangen, Friedrich-Alexander-Universität Erlangen-Nürnberg (FAU), 91054 Erlangen, Germany.

<sup>5</sup> Department of Nephrology and Hypertension, Friedrich-Alexander-Universität Erlangen-Nürnberg (FAU), 91054 Erlangen, Germany.

<sup>6</sup> Research Center On Rare Kidney Diseases (RECORD), University Hospital Erlangen, Friedrich-Alexander-Universität Erlangen-Nürnberg (FAU), 91054 Erlangen, Germany.

\* Correspondence: felix.engel@uk-erlangen.de

**Citation:** To be added by editorial staff during production.

Academic Editor: Firstname  
Lastname

Received: date  
Accepted: date  
Published: date

**Publisher's Note:** MDPI stays neutral with regard to jurisdictional claims in published maps and institutional affiliations.

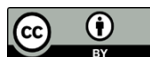

**Copyright:** © 2022 by the authors. Submitted for possible open access publication under the terms and conditions of the Creative Commons Attribution (CC BY) license (<https://creativecommons.org/licenses/by/4.0/>).

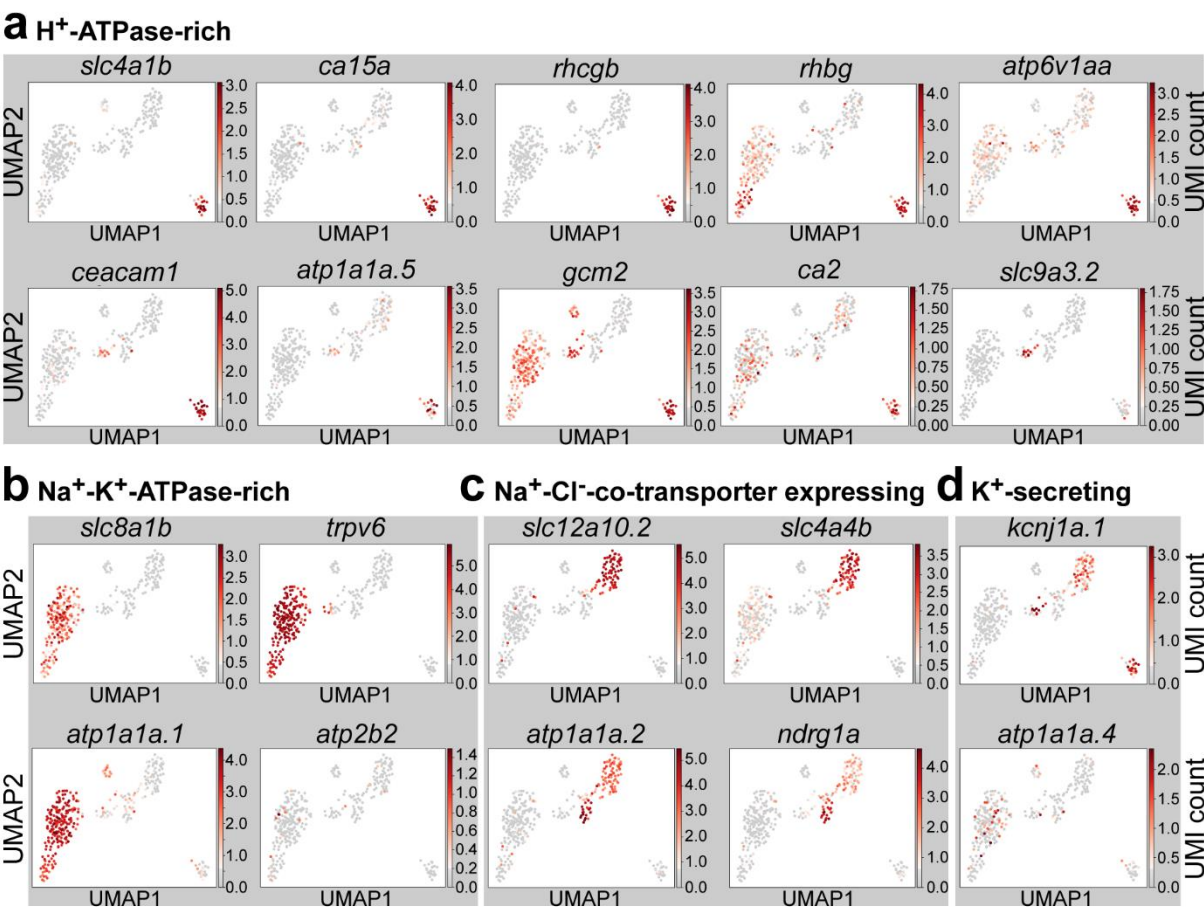

**Figure S1.** *gpr126* expression is detected in a sub-cluster of ionocytes. (a–d) UMAP plot of marker genes for ionocytes, whereby the normalized and scaled UMI (Unique Molecular Identifier) counts are colored in a scale from 0 UMI counts (gray) to the highest UMI count (dark red). The depicted genes are markers for (a)  $H^+$ -ATPase-rich ionocytes (b)  $Na^+$ - $K^+$ -ATPase-rich ionocytes (c)  $Na^+$ - $Cl^-$ -co-transporter expressing ionocytes (d)  $K^+$ -secreting ionocytes.

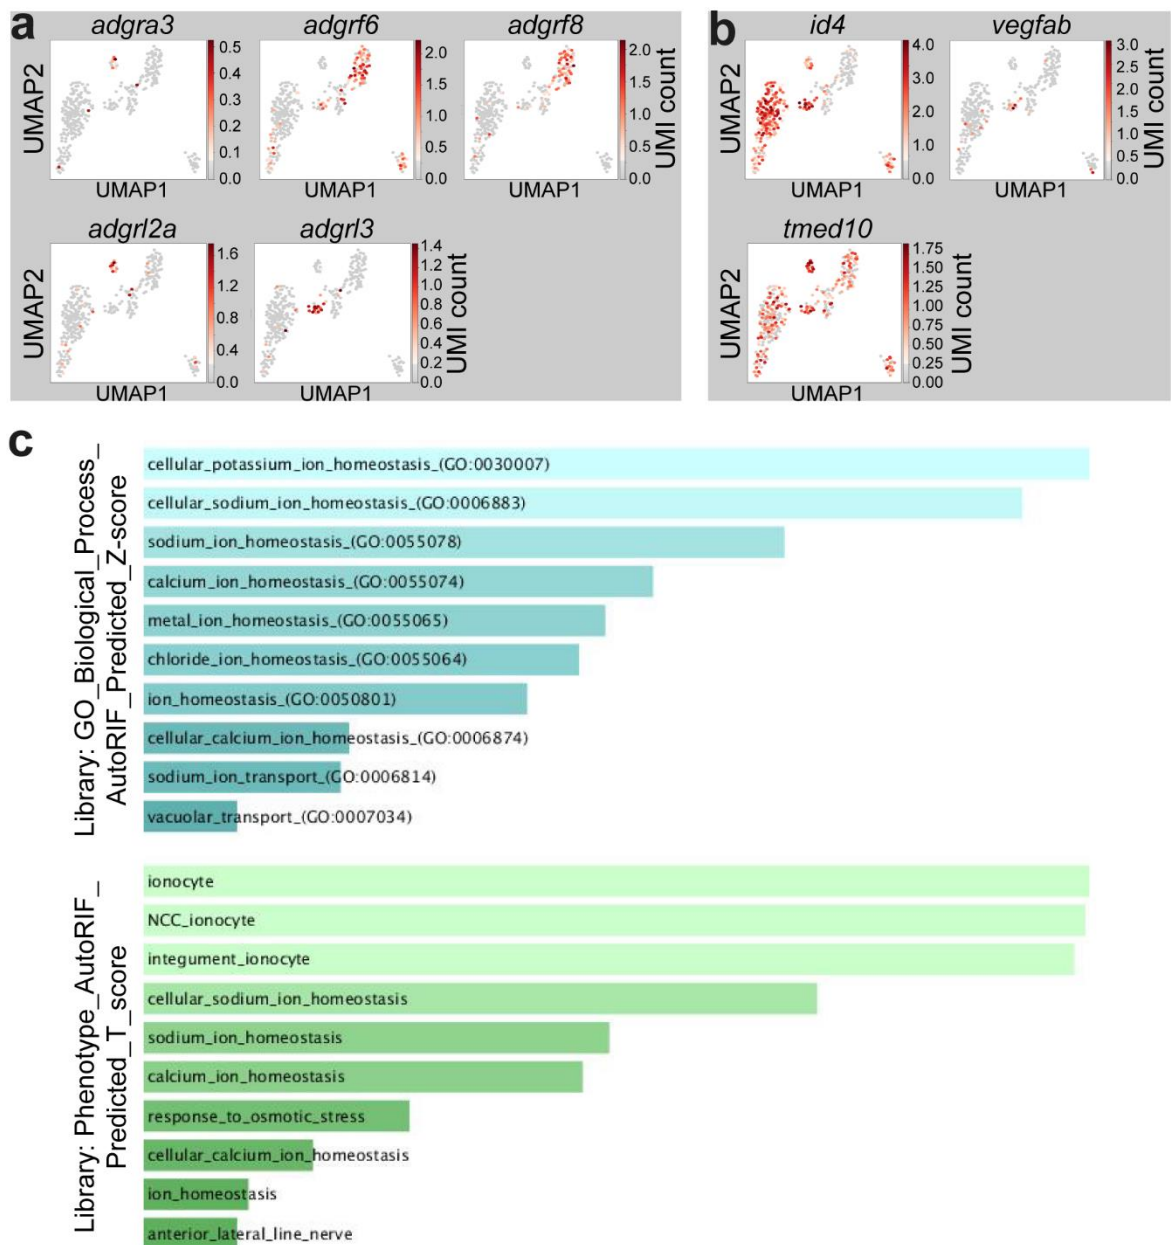

**Figure S2.** *gpr126* co-expression analysis. (a, b) UMAP plot of selected aGPCRs from Table S2 (a) and differentially expressed genes previously associated with *Gpr126* selected from Table S3 (b), whereby the normalized and scaled UMI (Unique Molecular Identifier) counts are colored in a scale from 0 UMI counts (gray) to the highest UMI count (dark red). (c) FishEnrichr analysis of differentially expressed genes comparing cells in which *gpr126* was detected versus cells that lack *gpr126* UMIs (Table S4, top 10).
