# Supplementary material for: Adhesion GPCR Gpr126 (Adgrg6) Expression Profiling in Zebrafish, Mouse, and Human Kidney
Source: Cells. 2023 Aug 2;12(15):1988. doi: 10.3390/cells12151988 (PMC10417176; doi:10.3390/cells12151988)
Supplement: Supplementary file 1 [file cells-12-01988-s001.zip]

Archive with 5 entries (5 files):
- CazorlaV¿ózquezS_supplementary figures_R1_marked.pdf
- CazorlaV¿ózquezS_Table S1.xlsx
- CazorlaV¿ózquezS_Table S2.xlsx
- CazorlaV¿ózquezS_Table S3.xlsx
- CazorlaV¿ózquezS_Table S4.xlsx
