# Supplementary material for: Adhesion GPCR Gpr126 (Adgrg6) Expression Profiling in Zebrafish, Mouse, and Human Kidney
Source: Cells. 2023 Aug 2;12(15):1988. doi: 10.3390/cells12151988 (PMC10417176; doi:10.3390/cells12151988)
Supplement: Supplementary file 1 [file cells-12-01988-s001.zip › CazorlaV¿ózquezS_Table S1.xlsx]

## Sheet: 14hpf
	Total_Cells	TPM	Cell%	TPM_in_adgrg6_non_negative_cells
endoderm	56	2.08028	3.57143	44.8064
neural plate	270	0.58018	1.48148	42.0261
presumptive telencephalon	67	0.309974	1.49254	41.6563
otic placode	66	1.86555	7.57576	35.6197
paraxial mesoderm	115	1.73224	5.21739	33.9427
notochord	43	1.58133	4.65116	33.1807
epidermal cell	347	1.36604	4.32277	29.1324
ionocyte progenitor cell	16	1.03175	6.25	27.0321
ectodermal cell	139	1.84817	7.19424	25.3874
segmental plate	221	0.101497	0.452489	23.6418
primordial germ cell	20	3.0743	15	23.2047
presumptive diencephalon	231	0.190274	0.865801	20.801
optic vesicle	286	0.3314	1.3986	20.7335
midbrain hindbrain boundary neural keel	484	0.24851	1.03306	20.5214
neural crest	186	2.84705	14.5161	19.359
lateral plate mesoderm	151	0.31085	1.3245	18.8342
periderm	114	0.314564	1.75439	16.4597
pronephric mesoderm	48	0.503378	2.08333	15.8758
central nervous system	198	0.210482	1.0101	13.5552
oligodendrocyte	0	0	0	0
lens	0	0	0	0
neuromast	0	0	0	0
nucleate erythrocyte	0	0	0	0
intestine	0	0	0	0
lens placode	0	0	0	0
olfactory pit	0	0	0	0
trigeminal placode	0	0	0	0
yolk syncytial layer	0	0	0	0
integument ionocyte	0	0	0	0
anterior axial hypoblast	0	0	0	0
epithelial cell	0	0	0	0
common myeloid progenitor	0	0	0	0
posterior lateral line ganglion	0	0	0	0
neurogenic placode	0	0	0	0
retinal rod cell	0	0	0	0
melanocyte	0	0	0	0
pharynx	0	0	0	0
hypothalamus	0	0	0	0
hindbrain neural keel	0	0	0	0
pectoral fin cartilage	0	0	0	0
ventricular zone	0	0	0	0
choroid plexus	0	0	0	0
spinal cord neural tube	0	0	0	0
gut	0	0	0	0
telencephalon	0	0	0	0
midbrain	0	0	0	0
pharyngeal arch	0	0	0	0
forebrain neural keel	0	0	0	0
hematopoietic stem cell	0	0	0	0
pectoral fin	0	0	0	0
cartilage element	0	0	0	0
lateral line ganglion	0	0	0	0
vasculature	0	0	0	0
neural tube	0	0	0	0
cardiac muscle	0	0	0	0
floor plate neural tube	0	0	0	0
blood island	0	0	0	0
Muller cell	0	0	0	0
chondrocranium	0	0	0	0
myoblast	0	0	0	0
kidney cell	0	0	0	0
renal system	0	0	0	0
pronephric duct	0	0	0	0
pharyngeal arch 3-7	0	0	0	0
anterior neural plate	0	0	0	0
dermal bone	0	0	0	0
muscle	0	0	0	0
renal glomerulus	0	0	0	0
fin	0	0	0	0
aortic arch	0	0	0	0
intestinal bulb	0	0	0	0
optic cup	0	0	0	0
neuron	0	0	0	0
optic tectum	0	0	0	0
pancreas	0	0	0	0
hindbrain	0	0	0	0
peripheral olfactory organ	0	0	0	0
Kupffer's vesicle	0	0	0	0
hematopoietic system	0	0	0	0
peripheral nervous system	0	0	0	0
cone retinal bipolar cell	0	0	0	0
brain	0	0	0	0
ionocyte	0	0	0	0
forebrain	0	0	0	0
liver	0	0	0	0
thrombocyte	0	0	0	0
pharyngeal epithelium	0	0	0	0
spinal cord	0	0	0	0
retinal neural layer	0	0	0	0
lateral mesoderm	0	0	0	0
hindbrain neural plate	0	0	0	0
mesenchyme pectoral fin	0	0	0	0
head mesenchyme	0	0	0	0
heart	0	0	0	0
trigeminal ganglion	0	0	0	0
neuroblast	0	0	0	0
macrophage	0	0	0	0
enteric musculature	0	0	0	0
hatching gland cell	0	0	0	0
anterior neural keel	0	0	0	0
floor plate rhombomere region	0	0	0	0
myotome	0	0	0	0
glial cell	0	0	0	0
otic vesicle	0	0	0	0
retina	0	0	0	0
hematopoietic cell	0	0	0	0
pectoral fin musculature	0	0	0	0
retinal cone cell	0	0	0	0
retinal photoreceptor layer	0	0	0	0
dermis	0	0	0	0
midbrain hindbrain boundary	0	0	0	0
midbrain interneuron	0	0	0	0
blood vasculature	0	0	0	0
skeletal muscle cell	0	0	0	0
eye	0	0	0	0
pigment cell	0	0	0	0
midbrain neural keel	0	0	0	0
olfactory bulb	0	0	0	0
pronephros	0	0	0	0
median fin fold	0	0	0	0
presumptive enteric nervous system	0	0	0	0
ganglion	0	0	0	0
cranial ganglion	0	0	0	0
cardiac muscle cell	0	0	0	0
immune system	0	0	0	0
blood cell	0	0	0	0
hindbrain neural tube	0	0	0	0
cornea	0	0	0	0
olfactory epithelium	0	0	0	0
artery	0	0	0	0
retinal ganglion cell	0	0	0	0
neuronal stem cell	0	0	0	0
radial glial cell	0	0	0	0
eye photoreceptor cell	0	0	0	0
diencephalon	0	0	0	0
xanthophore	0	0	0	0
solid lens vesicle	0	0	0	0
primitive heart tube	0	0	0	0
adaxial cell	0	0	0	0
mesenchymal cell	0	0	0	0
muscle pioneer	0	0	0	0
trunk	0	0	0	0
musculature system	0	0	0	0
amacrine cell	0	0	0	0
mesoderm	0	0	0	0
cranial cartilage	0	0	0	0
immature Schwann cell	0	0	0	0
neutrophil	0	0	0	0
floor plate	54	0	0
tail bud	248	0	0
primary neuron	101	0	0
polster	34	0	0
posterior lateral mesoderm	133	0	0
somite	234	0	0

## Sheet: 10dpf
	Total_Cells	TPM	Cell%	TPM_in_adgrg6_non_negative_cells
retinal ganglion cell	124	1.23211	0.806452	321.543
otic vesicle	102	125.393	35.2941	295.369
oligodendrocyte	681	50.0092	17.9148	274.248
ionocyte	160	33.2737	11.875	270.282
pharyngeal arch	1109	27.3883	11.5419	264.705
cranial cartilage	254	119.508	48.0315	242.752
macrophage	224	8.13156	3.125	226.869
vasculature	651	41.0245	16.4363	222.084
fin	456	127.438	54.6053	216.097
renal glomerulus	826	18.8093	8.83777	209.357
retinal cone cell	960	3.32525	1.25	197.416
liver	407	0.88995	0.4914	196.464
enteric musculature	310	9.69596	4.83871	180.957
peripheral nervous system	1022	3.3531	1.07632	180.636
muscle	408	2.02403	1.47059	179.211
cone retinal bipolar cell	598	3.27861	1.17057	165.259
glial cell	81	2.7858	2.46914	164.758
amacrine cell	514	1.26792	0.77821	164.264
radial glial cell	199	0.694796	0.502513	158.579
central nervous system	1145	3.41219	1.57205	158.519
dermis	2475	24.1793	13.4949	154.458
pigment cell	152	3.83625	1.97368	150.218
intestinal bulb	153	13.3928	7.84314	148.506
midbrain interneuron	124	19.0635	7.25806	147.717
cartilage element	321	23.1515	13.3956	146.723
neutrophil	184	0.623026	0.543478	141.743
peripheral olfactory organ	105	6.50137	2.85714	141.733
myotome	511	13.0149	10.1761	129.235
pancreas	130	1.0887	0.769231	125.031
retinal photoreceptor layer	569	1.37098	0.527241	123.583
myoblast	488	3.62494	3.07377	122.557
retinal rod cell	320	3.41301	1.875	118.562
nucleate erythrocyte	559	1.71153	1.25224	110.198
olfactory epithelium	171	4.58385	1.75439	109.437
pectoral fin	870	14.6683	12.5287	108.687
epidermal cell	1159	0.511303	0.431406	106.696
lens	126	3.57897	3.1746	104.02
hematopoietic cell	479	0.562138	0.626305	102.761
cornea	330	5.07016	4.54545	97.149
intestine	205	1.84151	1.46341	85.751
neuronal stem cell	395	0.49472	0.506329	58.355
neuromast	0	0	0	0
paraxial mesoderm	0	0	0	0
lens placode	0	0	0	0
olfactory pit	0	0	0	0
lateral plate mesoderm	0	0	0	0
trigeminal placode	0	0	0	0
yolk syncytial layer	0	0	0	0
integument ionocyte	0	0	0	0
pronephric mesoderm	0	0	0	0
anterior axial hypoblast	0	0	0	0
floor plate	0	0	0	0
epithelial cell	0	0	0	0
common myeloid progenitor	0	0	0	0
posterior lateral line ganglion	0	0	0	0
optic vesicle	0	0	0	0
tail bud	0	0	0	0
neurogenic placode	0	0	0	0
melanocyte	0	0	0	0
pharynx	0	0	0	0
primordial germ cell	0	0	0	0
hypothalamus	0	0	0	0
hindbrain neural keel	0	0	0	0
pectoral fin cartilage	0	0	0	0
ectodermal cell	0	0	0	0
ventricular zone	0	0	0	0
endoderm	0	0	0	0
choroid plexus	0	0	0	0
spinal cord neural tube	0	0	0	0
gut	0	0	0	0
telencephalon	0	0	0	0
midbrain	0	0	0	0
primary neuron	0	0	0	0
forebrain neural keel	0	0	0	0
hematopoietic stem cell	0	0	0	0
lateral line ganglion	0	0	0	0
neural tube	0	0	0	0
cardiac muscle	0	0	0	0
floor plate neural tube	0	0	0	0
blood island	0	0	0	0
chondrocranium	0	0	0	0
renal system	0	0	0	0
pronephric duct	0	0	0	0
pharyngeal arch 3-7	0	0	0	0
anterior neural plate	0	0	0	0
dermal bone	0	0	0	0
notochord	0	0	0	0
aortic arch	0	0	0	0
polster	0	0	0	0
optic cup	0	0	0	0
neuron	0	0	0	0
optic tectum	0	0	0	0
otic placode	0	0	0	0
hindbrain	0	0	0	0
Kupffer's vesicle	0	0	0	0
hematopoietic system	0	0	0	0
brain	0	0	0	0
forebrain	0	0	0	0
pharyngeal epithelium	0	0	0	0
spinal cord	0	0	0	0
retinal neural layer	0	0	0	0
lateral mesoderm	0	0	0	0
hindbrain neural plate	0	0	0	0
neural crest	0	0	0	0
mesenchyme pectoral fin	0	0	0	0
periderm	0	0	0	0
head mesenchyme	0	0	0	0
posterior lateral mesoderm	0	0	0	0
heart	0	0	0	0
trigeminal ganglion	0	0	0	0
hatching gland cell	0	0	0	0
neural plate	0	0	0	0
anterior neural keel	0	0	0	0
floor plate rhombomere region	0	0	0	0
ionocyte progenitor cell	0	0	0	0
retina	0	0	0	0
pectoral fin musculature	0	0	0	0
midbrain hindbrain boundary neural keel	0	0	0	0
midbrain hindbrain boundary	0	0	0	0
blood vasculature	0	0	0	0
skeletal muscle cell	0	0	0	0
eye	0	0	0	0
midbrain neural keel	0	0	0	0
olfactory bulb	0	0	0	0
pronephros	0	0	0	0
median fin fold	0	0	0	0
presumptive enteric nervous system	0	0	0	0
ganglion	0	0	0	0
cranial ganglion	0	0	0	0
cardiac muscle cell	0	0	0	0
immune system	0	0	0	0
blood cell	0	0	0	0
hindbrain neural tube	0	0	0	0
presumptive diencephalon	0	0	0	0
artery	0	0	0	0
segmental plate	0	0	0	0
eye photoreceptor cell	0	0	0	0
diencephalon	0	0	0	0
xanthophore	0	0	0	0
solid lens vesicle	0	0	0	0
primitive heart tube	0	0	0	0
adaxial cell	0	0	0	0
mesenchymal cell	0	0	0	0
muscle pioneer	0	0	0	0
trunk	0	0	0	0
musculature system	0	0	0	0
presumptive telencephalon	0	0	0	0
mesoderm	0	0	0	0
somite	0	0	0	0
immature Schwann cell	0	0	0	0
Muller cell	148	0	0
kidney cell	313	0	0
thrombocyte	15	0	0
neuroblast	46	0	0

## Sheet: 5dpf
Table S1
14 hpf	Total cell number	gpr126 transcripts per million (TPM)	Cells with detectable gpr126 expression [%]	gpr126 TPM in cells with detectable gpr126 expression		5 hpf	Total cell number	gpr126 transcripts per million (TPM)	Cells with detectable gpr126 expression [%]	gpr126 TPM in cells with detectable gpr126 expression		10 dpf	Total cell number	gpr126 transcripts per million (TPM)	Cells with detectable gpr126 expression [%]	gpr126 TPM in cells with detectable gpr126 expression
endoderm	56	2.08	3.57	44.81		epithelial cell	437	115.461	31.5789	371.011		retinal ganglion cell	124	1.23211	0.806452	321.543
neural plate	270	0.58018	1.48148	42.0261		enteric musculature	1575	16.9823	5.71429	333.646		otic vesicle	102	125.393	35.2941	295.369
presumptive telencephalon	67	0.309974	1.49254	41.6563		intestine	260	4.66895	2.30769	318.299		oligodendrocyte	681	50.0092	17.9148	274.248
otic placode	66	1.86555	7.57576	35.6197		cartilage element	1217	90.6406	26.212	298.689		ionocyte	160	33.2737	11.875	270.282
paraxial mesoderm	115	1.73224	5.21739	33.9427		otic vesicle	486	155.782	46.9136	284.417		pharyngeal arch	1109	27.3883	11.5419	264.705
notochord	43	1.58133	4.65116	33.1807		vasculature	1067	28.7449	9.09091	282.086		cranial cartilage	254	119.508	48.0315	242.752
epidermal cell	347	1.36604	4.32277	29.1324		fin	797	127.26	46.2986	278.129		macrophage	224	8.13156	3.125	226.869
ionocyte progenitor cell	16	1.03175	6.25	27.0321		cranial cartilage	919	108.877	38.3025	277.207		vasculature	651	41.0245	16.4363	222.084
ectodermal cell	139	1.84817	7.19424	25.3874		pharyngeal arch	1396	14.3619	5.94556	263.125		fin	456	127.438	54.6053	216.097
segmental plate	221	0.101497	0.452489	23.6418		liver	212	3.29874	2.83019	257.21		renal glomerulus	826	18.8093	8.83777	209.357
primordial germ cell	20	3.0743	15	23.2047		pectoral fin	1557	36.9815	13.8728	254.085		retinal cone cell	960	3.32525	1.25	197.416
presumptive diencephalon	231	0.190274	0.865801	20.801		myotome	885	33.302	14.5763	244.824		liver	407	0.88995	0.4914	196.464
optic vesicle	286	0.3314	1.3986	20.7335		mesoderm	966	28.5679	11.4907	240.76		enteric musculature	310	9.69596	4.83871	180.957
midbrain hindbrain boundary neural keel	484	0.24851	1.03306	20.5214		myoblast	635	2.80331	1.73228	213.97		peripheral nervous system	1022	3.3531	1.07632	180.636
neural crest	186	2.84705	14.5161	19.359		radial glial cell	712	4.15421	1.96629	209.29		muscle	408	2.02403	1.47059	179.211
lateral plate mesoderm	151	0.31085	1.3245	18.8342		cornea	488	5.95127	3.07377	207.045		cone retinal bipolar cell	598	3.27861	1.17057	165.259
periderm	114	0.314564	1.75439	16.4597		dermal bone	81	16.1343	8.64198	192.525		glial cell	81	2.7858	2.46914	164.758
pronephric mesoderm	48	0.503378	2.08333	15.8758		central nervous system	988	4.79163	2.63158	190.197		amacrine cell	514	1.26792	0.77821	164.264
central nervous system	198	0.210482	1.0101	13.5552		epidermal cell	4874	3.44643	1.70291	182.031		radial glial cell	199	0.694796	0.502513	158.579
floor plate	54	0	0	0		glial cell	192	11.7766	5.72917	171.514		central nervous system	1145	3.41219	1.57205	158.519
tail bud	248	0	0	0		blood cell	305	4.48231	2.62295	169.068		dermis	2475	24.1793	13.4949	154.458
primary neuron	101	0	0	0		neuron	549	2.56255	1.45719	167.302		pigment cell	152	3.83625	1.97368	150.218
polster	34	0	0	0		trunk	120	8.97528	5.83333	153.371		intestinal bulb	153	13.3928	7.84314	148.506
posterior lateral mesoderm	133	0	0	0		macrophage	609	6.19581	3.28407	150.01		midbrain interneuron	124	19.0635	7.25806	147.717
somite	234	0	0	0		pronephric duct	428	2.66185	2.1028	131.912		cartilage element	321	23.1515	13.3956	146.723
						integument ionocyte	191	11.8473	9.42408	125.97		neutrophil	184	0.623026	0.543478	141.743
						notochord	572	0.713138	0.524476	112.752		peripheral olfactory organ	105	6.50137	2.85714	141.733
						pancreas	38	4.96027	5.26316	107.643		myotome	511	13.0149	10.1761	129.235
						neuromast	274	7.68672	4.74453	107.111		pancreas	130	1.0887	0.769231	125.031
						median fin fold	574	1.42977	1.0453	104.701		retinal photoreceptor layer	569	1.37098	0.527241	123.583
						hematopoietic stem cell	312	2.14006	1.92308	98.8687		myoblast	488	3.62494	3.07377	122.557
						periderm	665	0.496019	0.451128	92.8189		retinal rod cell	320	3.41301	1.875	118.562
						neutrophil	245	2.1854	1.22449	91.2742		nucleate erythrocyte	559	1.71153	1.25224	110.198
						cardiac muscle	80	2.0327	2.5	68.0133		olfactory epithelium	171	4.58385	1.75439	109.437
						lens	66	1.74569	1.51515	62.6017		pectoral fin	870	14.6683	12.5287	108.687
						choroid plexus	34	0	0	0		epidermal cell	1159	0.511303	0.431406	106.696
						muscle	154	0	0	0		lens	126	3.57897	3.1746	104.02
						retina	27	0	0	0		hematopoietic cell	479	0.562138	0.626305	102.761
												cornea	330	5.07016	4.54545	97.149
												intestine	205	1.84151	1.46341	85.751
												neuronal stem cell	395	0.49472	0.506329	58.355
												Muller cell	148	0	0	0
												kidney cell	313	0	0	0
												thrombocyte	15	0	0	0
												neuroblast	46	0	0	0
