# Supplementary material for: Adhesion GPCR Gpr126 (Adgrg6) Expression Profiling in Zebrafish, Mouse, and Human Kidney
Source: Cells. 2023 Aug 2;12(15):1988. doi: 10.3390/cells12151988 (PMC10417176; doi:10.3390/cells12151988)
Supplement: Supplementary file 1 [file cells-12-01988-s001.zip › CazorlaV¿ózquezS_Table S2.xlsx]

## Sheet: Tabelle1
Gene name original annotation	Expression pattern	Human otholog (Zfin)	Ensembl_ID	TPM Cluster 1	TPM Cluster 2	Cluster 3 TPM	Cluster 4 TPM	Cluster 5 TPM	Cluster 6 TPM	Cluster 7 TPM	TPM all cells
adgra1a	no expression detected	ADGRA1	ENSDARG00000054177	0	0	0	0	0	0	0	0
adgra2	barely expressed	ADGRA2	ENSDARG00000076994	0	0	0	4.98	1.3	0	2.1	1.17
adgra3	precursor enriched	ADGRA3	ENSDARG00000073673	0	0	0	5.29	1.04	4.31	34.02	3.42
adgrb1a	barely expressed	ADGRB1	ENSDARG00000075133	0	8.66	2.62	25.25	2.53	0	0	4.33
adgrb1b	no expression detected	ADGRB1	ENSDARG00000078529	0	0	0	0	0	0	0	0
adgrb2	no expression detected	ADGRB2	ENSDARG00000025667	0	0	0	0	0	0	0	0
adgrb3	barely expressed	ADGRB3	ENSDARG00000059832	0	0	0	15.76	1.12	0	0	1.95
adgrd1	no expression detected	ADGRD1	ENSDARG00000053344	0	0	0	0	0	0	0	0
adgrd2	no expression detected	ADGRD2	ENSDARG00000103067	0	0	0	0	0	0	0	0
adgre5a	no expression detected	none	ENSDARG00000026313	0	0	0	0	0	0	0	0
adgre5b.3-1	barely expressed	none	ENSDARG00000112943	0	0	0	0	2.76	0	1.83	1.35
adgre5b.2	barely expressed	ADGRE2/ADGRE5	ENSDARG00000104083	0	0	3.56	10.34	0	0	0	1.55
adgre5b.3	barely expressed	several incl. ADGRE5	ENSDARG00000089904	0	0	0	0	7.45	15.89	11.41	5.69
adgre6	no expression detected	none	ENSDARG00000095494	0	0	0	0	0	0	0	0
adgre7	no expression detected	ADGRE4P	ENSDARG00000041399	0	0	0	0	0	0	0	0
adgre8	no expression detected	none	ENSDARG00000079050	0	0	0	0	0	0	0	0
adgre9	no expression detected	none	ENSDARG00000096577	0	0	0	0	0	0	0	0
adgre10	barely expressed	none	ENSDARG00000075855	0	0	3.33	9.97	0	0	0	1.48
adgre14	no expression detected	none	ENSDARG00000056062	0	0	0	0	0	0	0	0
adgre15	no expression detected	none	ENSDARG00000096588	0	0	0	0	0	0	0	0
adgre16	no expression detected	none	ENSDARG00000096622	0	0	0	0	0	0	0	0
adgre17	barely expressed	none	ENSDARG00000095297	0	0	0	6.1	1.62	0	0	1.29
adgre18	no expression detected	none	ENSDARG00000096644	0	0	0	0	0	0	0	0
adgre19	no expression detected	none	ENSDARG00000096649	0	0	0	0	0	0	0	0
adgrf3a	barely expressed	ADGRF3	ENSDARG00000087870	0	0	4.85	49.39	3.68	0	0	7
adgrf3b	barely expressed	ADGRF3	ENSDARG00000093008	0	0	0	0	14.65	4.3	0	7.06
adgrf6	random	ADGRF1	ENSDARG00000091757	209.96	136.16	340.96	138.31	11.56	114.13	0	110.06
adgrf7	barely expressed	several incl. ADGRF1	ENSDARG00000086445	0	0	0	8.82	4.99	6.25	0	3.71
adgrf8	random	ADGRF5	ENSDARG00000093316	0	43.58	303.6	101.07	8.73	28	0	70.07
adgrf11	no expression detected	ADGRF1	ENSDARG00000075134	0	0	0	0	0	0	0	0
adgrg1	barely expressed	ADGRG1	ENSDARG00000105643	0	0	0	0	9.5	16.29	0	5.98
adgrg1-1	barely expressed	no data	ENSDARG00000027222	0	0	0	0	9.37	0	5.18	4.54
adgrg2a	barely expressed	ADGRG2	ENSDARG00000088137	0	0	26.27	9.97	0	24.64	0	7.95
adgrg3	barely expressed	several incl. ADGRG3	ENSDARG00000074782	7.72	0	0	6.1	0	0	0	1.12
adgrg4a	barely expressed	ADGRG4	ENSDARG00000105416	0	0	5.13	0	1.62	0	0	1.61
adgrg4b	barely expressed	none	ENSDARG00000094386	0	0	0	10.33	4.1	11.34	0	3.97
adgrg7.1	barely expressed	ADGRG7	ENSDARG00000071088	0	0	0	5.67	0	0	0	0.52
adgrg7.2	no expression detected	ADGRG7	ENSDARG00000071085	0	0	0	0	0	0	0	0
adgrg11	barely expressed	none	ENSDARG00000041413	0	0	7.44	19.89	4.98	0	0	5.34
adgrl1a	barely expressed	ADGRL1	ENSDARG00000089292	0	0	0	0	2.29	4.31	6.19	1.85
adgrl2	random	no data	ENSDARG00000075899	0	62.68	10.63	0	8.28	44.6	35.01	15.41
adgrl2a	precursor enriched	ADGRL2	ENSDARG00000069356	29.9	0	8.89	37.72	6.92	36.66	191.61	25.44
adgrl2b.1	barely expressed	ADGRL2	ENSDARG00000111712	0	0	0	5.92	0	0	0	0.54
adgrl3	like Gpr126	no data	ENSDARG00000090624	0	322.44	0	21.62	7.5	16.4	3.96	23.53
adgrl3.1	barely expressed	ADGRL3	ENSDARG00000061121	0	0	0	0	6	0	12.02	3.42
adgrl4	barely expressed	ADGRL4	ENSDARG00000013653	0	0	4.76	0	0	0	0	0.81
adgrv1	random	ADGRV1	ENSDARG00000021137	8.17	15.93	3.24	26.04	25.19	19.73	83.35	22.7
