# Supplementary material for: Adhesion GPCR Gpr126 (Adgrg6) Expression Profiling in Zebrafish, Mouse, and Human Kidney
Source: Cells. 2023 Aug 2;12(15):1988. doi: 10.3390/cells12151988 (PMC10417176; doi:10.3390/cells12151988)
Supplement: Supplementary file 1 [file cells-12-01988-s001.zip › CazorlaV¿ózquezS_Table S3.xlsx]

## Sheet: Sheet1
Gene_name	Ensembl_ID	FDR	p-value	TPM of cells in which gpr126 expression is detected	TPM of cells in which gpr126 expression is not detected	LogFC coefficient
adgrg6/GPR126	ENSDARG00000054137	1.952E-49	9.467E-54	369.19	0.0
cd109	ENSDARG00000060609	9.799E-08	9.504E-12	247.89	17.64	-0.66
crhr1	ENSDARG00000003989	1.324E-06	1.926E-10	156.36	9.58	-0.43
esama	ENSDARG00000077039	2.498E-06	4.845E-10	155.85	11.58	-0.41
krt96	ENSDARG00000095147	2.911E-06	8.468E-10	255.14	44.32	-0.60
scara3	ENSDARG00000008060	2.911E-06	8.352E-10	53.18	0.0
cdkn1bb	ENSDARG00000054271	5.203E-06	2.019E-09	420.04	226.52	-0.58
zgc:123295	ENSDARG00000056324	5.203E-06	1.908E-09	313.68	190.16	-0.41
tmprss13a	ENSDARG00000100969	7.755E-06	3.385E-09	653.57	408.90	-0.79
pde4ba	ENSDARG00000032868	0.00002	8.388E-09	278.01	85.65	-0.57
odc1	ENSDARG00000007377	0.00003	1.332E-08	238.78	82.33	-0.44
RNF224	ENSDARG00000095415	0.00003	1.587E-08	142.27	5.52	-0.42
tspan2a	ENSDARG00000003754	0.00003	2.013E-08	216.35	59.79	-0.46
gal3st1a	ENSDARG00000062711	0.00003	2.263E-08	165.65	9.68	-0.43
mgat4a	ENSDARG00000063330	0.00004	2.984E-08	142.73	45.74	-0.28
emx3	ENSDARG00000020417	0.00004	3.250E-08	235.22	17.19	-0.59
notch1b	ENSDARG00000052094	0.00004	3.427E-08	271.50	36.91	-0.66
dll4	ENSDARG00000070425	0.00005	4.086E-08	216.97	58.84	-0.38
zgc:153665	ENSDARG00000043442	0.00006	5.793E-08	534.09	280.07	-0.81
ADGRL3	ENSDARG00000090624	0.00007	6.262E-08	125.61	11.10	-0.33
hephl1b	ENSDARG00000026403	0.00008	7.647E-08	210.77	12.21	-0.54
krt97	ENSDARG00000000212	0.00008	8.512E-08	456.98	156.73	-0.87
si:dkey-192d15.2	ENSDARG00000043770	0.00010	1.093E-07	223.09	92.65	-0.26
six2a	ENSDARG00000058004	0.00010	1.109E-07	114.67	9.28	-0.30
cald1a	ENSDARG00000070314	0.00013	1.512E-07	207.09	55.17	-0.43
st3gal3b	ENSDARG00000015252	0.00018	2.311E-07	90.03	6.70	-0.25
otop2	ENSDARG00000006522	0.00022	2.834E-07	118.98	4.47	-0.33
igsf5a	ENSDARG00000087983	0.00023	3.097E-07	207.79	43.44	-0.48
dlx4b	ENSDARG00000071560	0.00023	3.386E-07	96.85	6.69	-0.23
si:ch73-204p21.2	ENSDARG00000097902	0.00023	3.307E-07	207.88	47.20	-0.47
rab25a	ENSDARG00000058800	0.00030	4.535E-07	95.71	7.81	-0.24
dlx3b	ENSDARG00000014626	0.00030	5.171E-07	279.37	52.55	-0.64
si:dkey-240h12.3	ENSDARG00000095458	0.00032	5.285E-07	92.99	7.24	-0.25
tnnt2e	ENSDARG00000045822	0.00032	5.276E-07	128.70	5.82	-0.30
slc9a3.2	ENSDARG00000036722	0.00037	6.340E-07	111.65	7.25	-0.29
eya2	ENSDARG00000018984	0.00065	1.160E-06	442.64	248.38	-0.62
ism1	ENSDARG00000020541	0.00065	1.151E-06	100.83	6.49	-0.25
gal3st3	ENSDARG00000073728	0.00069	1.269E-06	124.19	16.40	-0.32
cd99	ENSDARG00000051975	0.00072	1.355E-06	156.65	53.17	-0.32
fgfbp2b	ENSDARG00000038056	0.00080	1.553E-06	38.39	7.36	-0.09
lfng	ENSDARG00000037879	0.00086	1.754E-06	267.53	43.42	-0.59
scdb	ENSDARG00000030265	0.00086	1.713E-06	101.87	8.41	-0.28
CABZ01061591.1	ENSDARG00000112977	0.00122	2.539E-06	125.16	36.19	-0.29
si:ch211-131k2.2	ENSDARG00000096645	0.00127	2.708E-06	112.72	1.36	-0.27
chchd7	ENSDARG00000068156	0.00133	0.000003	213.80	111.28	-0.31
slc46a3	ENSDARG00000077313	0.00133	0.000003	105.59	9.40	-0.29
BX247868.1	ENSDARG00000095301	0.00137	0.000003	135.87	5.66	-0.36
BX957317.3	ENSDARG00000117259	0.00137	0.000003	32.50	0.0
coq10b	ENSDARG00000056141	0.00141	0.000003	289.32	238.86	-0.17
ccdc85b	ENSDARG00000061543	0.00314	0.00001	137.36	19.58	-0.33
romo1	ENSDARG00000038076	0.00314	0.00001	500.55	705.73	0.39
cxxc5b	ENSDARG00000075735	0.00379	0.00001	117.57	26.02	-0.24
fryb	ENSDARG00000056001	0.00431	0.00001	97.04	13.97	-0.23
gprc5c	ENSDARG00000100862	0.00431	0.00001	220.95	92.23	-0.41
kcnj16	ENSDARG00000045039	0.00431	0.00001	50.50	1.80	-0.09
sparc	ENSDARG00000019353	0.00431	0.00001	237.99	76.92	-0.47
ftr99	ENSDARG00000035339	0.00537	0.00001	73.72	7.21	-0.22
trpv6	ENSDARG00000014496	0.00594	0.00002	1056.04	1026.58	-0.31
gmnn	ENSDARG00000035957	0.00607	0.00002	169.51	27.49	-0.34
crema	ENSDARG00000023217	0.00652	0.00002	202.79	99.21	-0.31
nrarpb	ENSDARG00000018958	0.00675	0.00002	85.98	24.36	-0.15
ankrd22	ENSDARG00000002298	0.00684	0.00002	191.60	80.49	-0.36
rln1	ENSDARG00000103762	0.00684	0.00002	61.06	3.00	-0.12
slc31a1	ENSDARG00000013961	0.00841	0.00003	299.58	145.48	-0.47
pcdh17	ENSDARG00000027041	0.00926	0.00003	526.78	300.14	-0.69
bcl2a	ENSDARG00000094704	0.00965	0.00003	96.94	21.60	-0.20
si:ch73-364h19.1	ENSDARG00000097523	0.01026	0.00003	133.04	10.00	-0.31
si:ch73-329n5.6	ENSDARG00000098256	0.01090	0.00004	54.94	2.85	-0.14
si:ch211-181l5.2	ENSDARG00000058906	0.01106	0.00004	26.96	0.0
sod3b	ENSDARG00000079183	0.01159	0.00004	59.64	2.75	-0.15
six4a	ENSDARG00000004695	0.01242	0.00004	299.069	173.67	-0.41
scgn	ENSDARG00000058732	0.01391	0.00005	82.68	6.01	-0.22
CABZ01044746.1	ENSDARG00000117312	0.01992	0.00007	105.48	20.45	-0.22
rhpn2	ENSDARG00000014577	0.02053	0.00007	374.72	259.50	-0.39
chp1	ENSDARG00000052859	0.02067	0.00008	286.043	108.94	-0.50
CU929259.1	ENSDARG00000101687	0.02121	0.00008	334.74	213.07	-0.42
acvrl1	ENSDARG00000018179	0.02217	0.00008	33.11	5.93	-0.08
mbnl2	ENSDARG00000018460	0.02252	0.00009	295.60	207.75	-0.29
id4	ENSDARG00000045131	0.02270	0.00009	571.71	364.43	-0.65
her15.2	ENSDARG00000054560	0.02295	0.00009	147.26	16.69	-0.31
atp2a2b	ENSDARG00000005122	0.02562	0.00010	184.09	89.81	-0.25
limch1b	ENSDARG00000103774	0.02600	0.00010	94.51	17.51	-0.23
s100a11	ENSDARG00000093628	0.02708	0.00011	980.95	1113.98	0.17
spred2b	ENSDARG00000008372	0.02708	0.00011	82.10	18.23	-0.19
mafba	ENSDARG00000017121	0.02853	0.00012	514.77	365.17	-0.51
vegfab	ENSDARG00000034700	0.02854	0.00012	77.64	11.97	-0.19
trib1	ENSDARG00000110963	0.03000	0.00013	464.95	337.74	-0.44
ackr4b	ENSDARG00000040133	0.03088	0.00013	74.21	7.20	-0.19
slc4a4a	ENSDARG00000013730	0.03183	0.00014	400.20	232.75	-0.54
rab1ba	ENSDARG00000058044	0.03203	0.00014	361.65	282.02	-0.28
gsna	ENSDARG00000011459	0.03239	0.00014	240.63	103.60	-0.40
krt17	ENSDARG00000094041	0.03311	0.00015	191.83	421.33	0.67
mid1ip1b	ENSDARG00000019302	0.03321	0.00015	421.52	283.62	-0.46
CABZ01067558.1	ENSDARG00000099598	0.03406	0.00016	29.36	2.22	-0.08
parp8	ENSDARG00000059789	0.03406	0.00016	83.01	12.65	-0.17
LO018333.1	ENSDARG00000114191	0.03410	0.00016	13.72	0.0
hivep2a	ENSDARG00000039987	0.03489	0.00016	119.89	49.09	-0.25
col9a2	ENSDARG00000024492	0.03563	0.00017	28.67	8.26	-0.06
sdcbp2	ENSDARG00000012513	0.03826	0.00018	321.04	201.46	-0.36
her6	ENSDARG00000006514	0.03848	0.00019	111.34	36.74	-0.16
cyth1a-1	ENSDARG00000076742	0.03915	0.00019	256.78	134.20	-0.36
tmed10	ENSDARG00000041391	0.03942	0.00020	308.21	189.76	-0.35
nfil3-5	ENSDARG00000094965	0.04307	0.00022	115.70	27.74	-0.26
r3hdml	ENSDARG00000030650	0.04718	0.00024	12.59	0.0
BX088583.2	ENSDARG00000101555	0.04789	0.00025	12.75	0.0
BX957317.1	ENSDARG00000095192	0.04789	0.00025	33.03	1.00	-0.08
pld1a	ENSDARG00000056228	0.04836	0.00025	60.45	7.26	-0.12
