# Supplementary material for: Adhesion GPCR Gpr126 (Adgrg6) Expression Profiling in Zebrafish, Mouse, and Human Kidney
Source: Cells. 2023 Aug 2;12(15):1988. doi: 10.3390/cells12151988 (PMC10417176; doi:10.3390/cells12151988)
Supplement: Supplementary file 1 [file cells-12-01988-s001.zip › CazorlaV¿ózquezS_Table S4.xlsx]

## Sheet: Phenotype_AutoRIF_Predicted_Z-s
FishEnrichr Analysis
Library: GO_Biological_Process_AutoRIF_Predicted_Z-score (Terms: 1747, Gene coverage: 13132)
Nr.	Term	Overlap	p-value	Adjusted p-value	Z-score	Combined Score	Genes
1	cellular_potassium_ion_homeostasis_(GO:0030007)	8/200	0.000012	0.0022	-3.46	39.13	acvrl1;si:dkey-192d15.2;s100a11;si:ch73-329n5.6;trpv6;krt17;tmprss13a;zgc:123295
2	cellular_sodium_ion_homeostasis_(GO:0006883)	8/200	0.000012	0.0022	-3.37	38.17	acvrl1;si:dkey-192d15.2;kcnj16;s100a11;si:ch73-329n5.6;trpv6;tmprss13a;zgc:123295
3	sodium_ion_homeostasis_(GO:0055078)	8/200	0.000012	0.0022	-3.07	34.78	si:dkey-192d15.2;kcnj16;s100a11;si:ch73-329n5.6;trpv6;tmprss13a;zgc:123295;slc9a3.2
4	calcium_ion_homeostasis_(GO:0055074)	7/200	0.000101	0.0057	-3.58	32.90	si:dkey-192d15.2;kcnj16;s100a11;si:ch73-329n5.6;trpv6;tmprss13a;zgc:123295
5	metal_ion_homeostasis_(GO:0055065)	7/200	0.000101	0.0057	-3.50	32.22	si:dkey-192d15.2;kcnj16;s100a11;si:ch73-329n5.6;tmprss13a;zgc:123295;slc9a3.2
6	chloride_ion_homeostasis_(GO:0055064)	7/200	0.000101	0.0057	-3.46	31.85	si:dkey-192d15.2;kcnj16;s100a11;si:ch73-329n5.6;trpv6;tmprss13a;zgc:123295
7	ion_homeostasis_(GO:0050801)	8/200	0.000012	0.0022	-2.75	31.11	acvrl1;si:dkey-192d15.2;kcnj16;s100a11;si:ch73-329n5.6;tmprss13a;zgc:123295;slc9a3.2
8	cellular_calcium_ion_homeostasis_(GO:0006874)	6/200	0.000726	0.0196	-3.95	28.57	si:dkey-192d15.2;kcnj16;s100a11;si:ch73-329n5.6;tmprss13a;zgc:123295
9	sodium_ion_transport_(GO:0006814)	7/200	0.000101	0.0057	-3.09	28.45	si:dkey-192d15.2;kcnj16;si:ch73-329n5.6;chp1;tmprss13a;zgc:123295;slc9a3.2
10	vacuolar_transport_(GO:0007034)	7/200	0.000101	0.0057	-2.93	26.97	si:dkey-192d15.2;vegfab;kcnj16;s100a11;tmprss13a;zgc:123295;slc9a3.2
11	venous_blood_vessel_development_(GO:0060841)	7/200	0.000101	0.0057	-2.73	25.12	her6;notch1b;lfng;esama;acvrl1;limch1b;dll4
12	neuromast_deposition_(GO:0048885)	8/200	0.000012	0.0022	-2.16	24.41	lfng;rab25a;gal3st1a;cd109;six4a;dlx3b;coq10b;ism1
13	regulation_of_sodium_ion_transport_(GO:0002028)	6/200	0.000726	0.0196	-3.33	24.10	si:dkey-192d15.2;kcnj16;si:ch73-329n5.6;chp1;tmprss13a;slc9a3.2
14	vesicle_fusion_(GO:0006906)	7/200	0.000101	0.0057	-2.56	23.54	lfng;krt97;rab25a;dlx3b;atp2a2b;sparc;si:ch73-204p21.2
15	carbohydrate_phosphorylation_(GO:0046835)	5/200	0.004438	0.0511	-4.08	22.09	notch1b;crema;acvrl1;ackr4b;dll4
16	regulation_of_vesicle_fusion_(GO:0031338)	7/200	0.000101	0.0057	-2.35	21.62	krt97;krt96;pld1a;rab25a;krt17;dlx3b;sparc
17	response_to_ethanol_(GO:0045471)	7/200	0.000101	0.0057	-2.27	20.84	slc4a4a;her6;notch1b;lfng;esama;pld1a;limch1b
18	potassium_ion_homeostasis_(GO:0055075)	8/200	0.000012	0.0022	-1.76	19.96	acvrl1;si:dkey-192d15.2;s100a11;si:ch73-329n5.6;trpv6;krt17;tmprss13a;zgc:123295
19	RNA_destabilization_(GO:0050779)	5/200	0.004438	0.0511	-3.61	19.56	krt97;pld1a;rab25a;dlx3b;ism1
20	negative_regulation_of_cell_death_(GO:0060548)	8/200	0.000012	0.0022	-1.60	18.08	lfng;pld1a;rab25a;rhpn2;dlx3b;atp2a2b;sdcbp2;ism1
Library: Phenotype_AutoRIF_Predicted_T_score (Terms: 2405, Gene coverage: 13910)
Nr.	Term	Overlap	p-value	Adjusted p-value	Z-score	Combined Score	Genes
1	ionocyte	9/200	0.000001	0.0011	-3.49	47.27	acvrl1;si:dkey-192d15.2;kcnj16;s100a11;si:ch73-329n5.6;trpv6;tmprss13a;zgc:123295;slc9a3.2
2	NCC_ionocyte	8/200	0.000012	0.0017	-4.17	47.18	acvrl1;si:dkey-192d15.2;kcnj16;s100a11;si:ch73-329n5.6;trpv6;tmprss13a;zgc:123295
3	integument_ionocyte	9/200	0.000001	0.0011	-3.46	46.93	acvrl1;si:dkey-192d15.2;kcnj16;s100a11;si:ch73-329n5.6;trpv6;tmprss13a;zgc:123295;slc9a3.2
4	cellular_sodium_ion_homeostasis	8/200	0.000012	0.0017	-3.63	41.13	acvrl1;si:dkey-192d15.2;kcnj16;s100a11;si:ch73-329n5.6;trpv6;tmprss13a;zgc:123295
5	sodium_ion_homeostasis	8/200	0.000012	0.0017	-3.22	36.44	si:dkey-192d15.2;kcnj16;s100a11;si:ch73-329n5.6;trpv6;tmprss13a;zgc:123295;slc9a3.2
6	calcium_ion_homeostasis	7/200	0.000101	0.0046	-3.90	35.84	si:dkey-192d15.2;kcnj16;s100a11;si:ch73-329n5.6;trpv6;tmprss13a;zgc:123295
7	response_to_osmotic_stress	7/200	0.000101	0.0046	-3.47	31.93	acvrl1;si:dkey-192d15.2;s100a11;si:ch73-329n5.6;trpv6;tmprss13a;zgc:123295
8	cellular_calcium_ion_homeostasis	6/200	0.000726	0.0121	-4.12	29.76	si:dkey-192d15.2;kcnj16;s100a11;si:ch73-329n5.6;tmprss13a;zgc:123295
9	ion_homeostasis	8/200	0.000012	0.0017	-2.50	28.30	acvrl1;si:dkey-192d15.2;kcnj16;s100a11;si:ch73-329n5.6;tmprss13a;zgc:123295;slc9a3.2
10	anterior_lateral_line_nerve	8/200	0.000012	0.0017	-2.48	28.05	krt97;rab25a;six4a;krt17;tmprss13a;dlx3b;zgc:153665;ism1
11	sodium_ion_transport	7/200	0.000101	0.0046	-2.97	27.35	si:dkey-192d15.2;kcnj16;si:ch73-329n5.6;chp1;tmprss13a;zgc:123295;slc9a3.2
12	keratinocyte_differentiation	8/200	0.000012	0.0017	-2.35	26.64	krt97;si:dkey-192d15.2;s100a11;rab25a;krt17;tmprss13a;dlx3b;zgc:123295
13	keratinocyte_proliferation	7/200	0.000101	0.0046	-2.87	26.43	krt97;rab25a;krt17;tmprss13a;dlx3b;zgc:123295;si:ch73-204p21.2
14	esophageal_epithelium	8/200	0.000012	0.0017	-2.25	25.48	her6;col9a2;gal3st1a;six4a;adgrg6;dlx3b;r3hdml;sparc
15	aortic_arch_4	5/200	0.004438	0.0321	-4.50	24.36	notch1b;esama;limch1b;ackr4b;dll4
16	response_to_ethanol	7/200	0.000101	0.0046	-2.62	24.08	slc4a4a;her6;notch1b;lfng;esama;pld1a;limch1b
17	ceratobranchial_5_bone	8/200	0.000012	0.0017	-2.06	23.33	her6;lfng;col9a2;six4a;dlx3b;atp2a2b;sparc;ism1
18	regulation_of_nitric_oxide_biosynthetic_process	6/200	0.000726	0.0121	-3.14	22.68	notch1b;trib1;acvrl1;vegfab;ackr4b;dll4
19	connective_tissue_cell	7/200	0.000101	0.0046	-2.43	22.34	krt97;pld1a;rab25a;dlx3b;atp2a2b;sparc;si:ch73-204p21.2
20	cellular_response_to_osmotic_stress	6/200	0.000726	0.0121	-3.09	22.33	acvrl1;si:dkey-192d15.2;s100a11;si:ch73-329n5.6;tmprss13a;zgc:123295
